# Supplementary material
Source: Springer Nature journal article supplement (https://www.springermedizin.de/resource/supplementary/12947_2007_177_MOESM4_ESM.pdf/9556394)

**Delta FS %**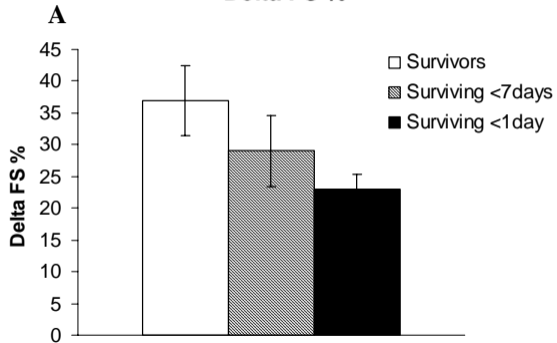**Delta R-R msec**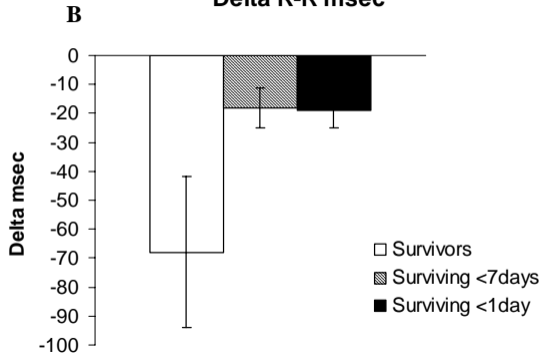

Supplement: MOESM4 [file 9556394]
